# Supplementary material for: DPP-IV Inhibitory Peptides GPF, IGL, and GGGW Obtained from Chicken Blood Hydrolysates
Source: MDPI journal article supplement (doi:10.3390/ijms232214140), 2022-11-16
Supplement: s1 [file s1]

Supplementary data Table S1. Sequences of the peptides identified in fraction 2 obtained after RP-HPLC separation of AP and APP chicken blood hydrolysates. Identification was performed by mass spectrometry in tandem.

| AP SAMPLE |                                                   |                           |                     |                      |                       |                        |                      |
|-----------|---------------------------------------------------|---------------------------|---------------------|----------------------|-----------------------|------------------------|----------------------|
| Num       | Names                                             | Sequence                  | Obs MW <sup>a</sup> | Obs m/z <sup>b</sup> | Theor MW <sup>c</sup> | Theor m/z <sup>d</sup> | Theor z <sup>e</sup> |
| 1         | Uncharacterized protein                           | VAEQELLDASERVQL           | 1698.89             | 567.30               | 1698.88               | 567.30                 | 3                    |
| 2         | Uncharacterized protein                           | VAEQELLDASERVQLL          | 1811.97             | 906.99               | 1811.96               | 906.99                 | 2                    |
| 3         | Uncharacterized protein                           | LLDASERVQL                | 1142.63             | 572.32               | 1142.63               | 572.32                 | 2                    |
| 4         | Histone H3                                        | IAQDFKTDLRFQ              | 1480.77             | 494.60               | 1480.77               | 494.60                 | 3                    |
| 5         | 6-phosphogluconate dehydrogenase, decarboxylating | GLLFVGSVSGGEEGAR          | 1590.81             | 796.41               | 1590.80               | 796.41                 | 2                    |
| 6         | Collagen alpha-1(I) chain                         | FSFLPQPPQEKAHDGGRYY       | 2236.08             | 560.03               | 2236.07               | 560.02                 | 4                    |
| 7         | Collagen alpha-1(I) chain                         | FLPQPPQEKAHDGGRYY         | 2001.98             | 501.50               | 2001.97               | 501.50                 | 4                    |
| 8         | Actin, aortic smooth muscle                       | LAGRDLTDY                 | 1022.50             | 512.26               | 1022.50               | 512.26                 | 2                    |
| 9         | Actin, aortic smooth muscle                       | NVPIYEGY                  | 953.45              | 477.73               | 953.45                | 477.73                 | 2                    |
| 10        | Actin, aortic smooth muscle                       | VWIGGSILASL               | 1114.64             | 558.33               | 1114.64               | 558.33                 | 2                    |
| 11        | Actin, aortic smooth muscle                       | IIAPPERKYS                | 1172.66             | 391.89               | 1172.65               | 391.89                 | 3                    |
| 12        | Actin, aortic smooth muscle                       | FIGMESAGIH                | 1076.50             | 539.26               | 1076.50               | 539.25                 | 2                    |
| 13        | Uncharacterized protein                           | IVAGAMVVIVVIFV            | 1428.76             | 715.39               | 1428.88               | 715.45                 | 2                    |
| 14        | REVERSED C1q domain-containing protein            | PVGPMGPLGPA               | 991.54              | 496.77               | 991.52                | 496.77                 | 2                    |
| 15        | SERPIN domain-containing protein                  | QAVNFKTDAEQARAQIN         | 1885.96             | 629.66               | 1885.93               | 629.65                 | 3                    |
| 16        | REVERSED Elastin                                  | GPVGPVGAVG                | 808.46              | 405.24               | 808.44                | 405.23                 | 2                    |
| 17        | REVERSED VWFA domain-containing protein           | GTEGPLGPLGPQ              | 1121.55             | 561.78               | 1121.57               | 561.79                 | 2                    |
| 18        | REVERSED VWFA domain-containing protein           | GEKGPLGPNPVGIV            | 1276.81             | 639.41               | 1276.68               | 639.35                 | 2                    |
| 19        | REVERSED VWFA domain-containing protein           | RDGPQGPLGPAG              | 1121.55             | 561.78               | 1121.54               | 561.78                 | 2                    |
| 20        | Collagen IV NC1 domain-containing protein         | LPGIPQDGGPPGPGIPGCNGTK    | 2124.99             | 709.34               | 2125.06               | 709.36                 | 3                    |
| 21        | Alpha 1 type IIA collagen                         | GPQKQVGPPTGAPG            | 1122.55             | 562.28               | 1122.57               | 562.29                 | 2                    |
| 22        | Alpha 1 type IIA collagen                         | GPAGAPGFPGAPGSKGEAGPTGARG | 2146.09             | 537.53               | 2146.05               | 537.52                 | 4                    |
| 23        | RIX1 domain-containing protein                    | LGLRHQAGVEPGGAGAA         | 1559.81             | 520.94               | 1559.82               | 520.95                 | 3                    |

|    |                                                 |                       |         |        |         |        |   |
|----|-------------------------------------------------|-----------------------|---------|--------|---------|--------|---|
| 24 | SERPIN domain-containing protein                | EMISMALPTENT          | 1561.79 | 781.90 | 1561.77 | 781.89 | 2 |
| 25 | Uncharacterized protein                         | AVASSGMSKMLPSVP       | 1460.71 | 731.36 | 1460.74 | 731.38 | 2 |
| 26 | Chloride channel protein                        | AAAAGVSVAFGAP         | 1087.50 | 544.76 | 1087.57 | 544.79 | 2 |
| 27 | MFS domain-containing protein                   | GLRDLLGTEDMWNVLLSFSG  | 2222.05 | 556.52 | 2222.10 | 556.53 | 4 |
| 28 | Hemoglobin subunit alpha-A                      | NHIDDIAGT             | 954.44  | 478.23 | 954.44  | 478.22 | 2 |
| 29 | Glucosamine-6-phosphate isomerase               | SSRTRLKTLAMDTILANAK   | 2089.10 | 697.37 | 2089.17 | 697.40 | 3 |
| 30 | ATP-dependent 6-phosphofructokinase             | AGLLDELLRDGLISE       | 1612.85 | 807.43 | 1612.87 | 807.44 | 2 |
| 31 | REVERSED Uncharacterized protein                | TSIRSAQIAVLNGGVGNI    | 1769.02 | 590.68 | 1768.98 | 590.67 | 3 |
| 32 | REVERSED HECT domain-containing protein         | SLASTGGFLSRTASSGSGPPP | 1989.99 | 664.34 | 1989.97 | 664.33 | 3 |
| 33 | REVERSED Uncharacterized protein                | GAGLLLEALEKGYWV       | 1730.98 | 578.00 | 1730.96 | 577.99 | 3 |
| 34 | REVERSED Uncharacterized protein                | LKATAPVRN             | 968.63  | 485.32 | 968.58  | 485.30 | 2 |
| 35 | REVERSED LAM_G_DOMAIN domain-containing protein | GPAGDAGAEGKPGIPG      | 1349.67 | 450.90 | 1349.66 | 450.89 | 3 |
| 36 | Transient receptor potential ankyrin 1          | LRSFIKKN              | 1004.72 | 503.37 | 1004.61 | 503.31 | 2 |
| 37 | Beta-2-microglobulin (Fragment)                 | NCFAAGF               | 728.36  | 365.19 | 728.30  | 365.15 | 2 |
| 38 | TYR_PHOSPHATASE_2 domain-containing protein     | VAGLGRAPVLVAL         | 1234.87 | 618.44 | 1234.78 | 618.39 | 2 |
| 39 | Uncharacterized protein                         | LGYNDYVK              | 970.46  | 486.24 | 970.48  | 486.24 | 2 |
| 40 | Uncharacterized protein                         | ELSDQLKAKN            | 1144.69 | 573.35 | 1144.61 | 573.31 | 2 |
| 41 | Uncharacterized protein                         | RKSGESANAVP           | 1114.64 | 558.33 | 1114.57 | 558.29 | 2 |
| 42 | REVERSED Threonine synthase-like 2              | LLPICSPMFLGGDPAYGSFLA | 2168.15 | 723.72 | 2168.07 | 723.70 | 3 |
| 43 | REVERSED Collagen alpha-1(VIII) chain           | GMPGIEGKP             | 884.43  | 443.22 | 884.44  | 443.23 | 2 |
| 44 | Uncharacterized protein                         | APESLLAGQN            | 998.45  | 500.23 | 998.50  | 500.26 | 2 |
| 45 | REVERSED Uncharacterized protein                | ARSSKTTGRQVDKT        | 1533.77 | 767.89 | 1533.82 | 767.92 | 2 |
| 46 | REVERSED Uncharacterized protein                | LGPFSFSFGPAT          | 1226.58 | 614.30 | 1226.60 | 614.30 | 2 |
| 47 | REVERSED RIX1 domain-containing protein         | EGWGGRGGGYGRASRT      | 1622.79 | 812.40 | 1622.76 | 812.39 | 2 |
| 48 | REVERSED Uncharacterized protein                | PGPAASVREALVAPQLGGAAP | 1928.02 | 643.68 | 1928.05 | 643.69 | 3 |
| 49 | Uncharacterized protein                         | LPQGCKAAAPQRARSVPV    | 1919.01 | 960.51 | 1919.05 | 960.53 | 2 |
| 50 | Fanconi anemia group C protein homolog          | SLLDQLTSLQINSLEK      | 1800.93 | 601.32 | 1800.98 | 601.33 | 3 |
| 51 | RanBP2-type domain-containing protein           | ALLRGEGR              | 870.63  | 436.32 | 870.50  | 436.25 | 2 |

|    |                                                                                                                        |                                        |         |         |         |        |   |
|----|------------------------------------------------------------------------------------------------------------------------|----------------------------------------|---------|---------|---------|--------|---|
| 52 | REVERSED XRCC1_N domain-containing protein                                                                             | RQRSGPQRRARKPA                         | 1662.82 | 555.28  | 1662.96 | 555.33 | 3 |
| 53 | REVERSED Uncharacterized protein                                                                                       | GNGGGWGNSSGGGGGGGGNGDGGGGDGCNSGGCGGGGG | 2923.76 | 585.76  | 2924.02 | 585.81 | 5 |
| 54 | Elongation factor 1-alpha                                                                                              | IGGIGTVPVGR                            | 1024.60 | 513.31  | 1024.60 | 513.31 | 2 |
| 55 | REVERSED ULP_PROTEASE domain-containing protein                                                                        | SPSKRFRGWRARTERT                       | 1989.99 | 664.34  | 1990.07 | 664.36 | 3 |
| 56 | Ovocleidin-17                                                                                                          | PTWALLGCVLLPSLR                        | 1751.19 | 584.74  | 1751.01 | 584.68 | 3 |
| 57 | Protein kinase domain-containing protein                                                                               | LTEVTTCYSVCHHEVLG                      | 1889.96 | 630.99  | 1889.86 | 630.96 | 3 |
| 58 | Uncharacterized protein                                                                                                | PMADSGCLTEGEMGLIFVN                    | 1982.82 | 661.95  | 1982.88 | 661.97 | 3 |
| 59 | Uncharacterized protein                                                                                                | GAIEILLTYIVPQAAI                       | 1683.98 | 843.00  | 1683.98 | 843.00 | 2 |
| 60 | Uncharacterized protein                                                                                                | RAAELRPLR                              | 1080.74 | 541.38  | 1080.65 | 541.33 | 2 |
| 61 | REVERSED CDH3                                                                                                          | DDDADTANVRMVS                          | 1407.70 | 704.86  | 1407.59 | 704.80 | 2 |
| 62 | REVERSED Uncharacterized protein                                                                                       | ELEAAEEQARWQLV                         | 1798.90 | 600.64  | 1798.88 | 600.63 | 3 |
| 63 | Non-specific serine/threonine protein kinase                                                                           | VGTADGTLAVFEDR                         | 1449.79 | 725.90  | 1449.71 | 725.86 | 2 |
| 64 | Non-specific serine/threonine protein kinase                                                                           | GEGPPRVDFVD                            | 1186.54 | 594.28  | 1186.56 | 594.29 | 2 |
| 65 | REVERSED DNA helicase; REVERSED Bloom syndrome protein homolog                                                         | LIKDLVLK                               | 940.62  | 471.312 | 940.63  | 471.32 | 2 |
| 66 | Ribonuclease H                                                                                                         | GKQYVLGVGEIISGLLQ                      | 1814.98 | 606.00  | 1815.05 | 606.02 | 3 |
| 67 | Uncharacterized protein                                                                                                | AQQPVQSELVQRCQ                         | 1612.84 | 538.62  | 1612.80 | 538.61 | 3 |
| 68 | VWFD domain-containing protein; Uncharacterized protein                                                                | DFSLHVSYDAD                            | 1267.52 | 634.77  | 1267.53 | 634.77 | 2 |
| 69 | Serine/threonine-protein kinase 10                                                                                     | RELVAEAKAE                             | 1114.64 | 558.33  | 1114.60 | 558.31 | 2 |
| 70 | REVERSED ATP-grasp domain-containing protein; REVERSED Succinate--CoA ligase [ADP-forming] subunit beta, mitochondrial | KAIKYAAE                               | 950.52  | 476.26  | 950.51  | 476.26 | 2 |
| 71 | REVERSED DUF676 domain-containing protein                                                                              | LLMKIKFI                               | 1004.72 | 503.37  | 1004.64 | 503.33 | 2 |
| 72 | REVERSED Integrator complex subunit 2                                                                                  | PLEAQLICLVDAEE                         | 1612.84 | 807.43  | 1612.80 | 807.41 | 2 |
| 73 | REVERSED Uncharacterized protein                                                                                       | CVLKIRGV                               | 886.65  | 444.33  | 886.54  | 444.28 | 2 |
| 74 | REVERSED Fanconi_A_N domain-containing protein; REVERSED Fanconi anemia protein FancA                                  | KTVANKAALVATP                          | 1282.90 | 642.46  | 1282.76 | 642.39 | 2 |
| 75 | REVERSED Uncharacterized protein; REVERSED Inhibitor_I29 domain-containing protein                                     | PLQFCKRANVEK                           | 1431.73 | 716.87  | 1431.76 | 716.89 | 2 |
| 76 | REVERSED Sodium/hydrogen exchanger                                                                                     | FIGLFIGISKFMAT                         | 1543.82 | 515.61  | 1543.85 | 515.62 | 3 |
| 77 | REVERSED Uncharacterized protein; REVERSED Monocarboxylate transporter 10                                              | AWIRYSKVKFVSFNF                        | 1891.09 | 631.37  | 1891.01 | 631.34 | 3 |
| 78 | REVERSED SAM domain-containing protein; REVERSED SAM domain-containing                                                 | GNGRNRCDPIEKT                          | 1515.79 | 758.90  | 1515.72 | 758.87 | 2 |

|    |                                                         |                    |                           |                            |                             |                              |                            |
|----|---------------------------------------------------------|--------------------|---------------------------|----------------------------|-----------------------------|------------------------------|----------------------------|
| 79 | REVERSED Protein-tyrosine-phosphatase                   | YVIDKPPDGPAGESTRFI | 1960.98                   | 654.67                     | 1960.99                     | 654.67                       | 3                          |
|    | APP SAMPLE                                              |                    |                           |                            |                             |                              |                            |
|    | <b>Names</b>                                            | <b>Sequence</b>    | <b>Obs MW<sup>a</sup></b> | <b>Obs m/z<sup>b</sup></b> | <b>Theor MW<sup>c</sup></b> | <b>Theor m/z<sup>d</sup></b> | <b>Theor z<sup>e</sup></b> |
| 80 | Hemoglobin subunit alpha-A                              | TTYPTTKTYFPH       | 1451.71                   | 484.91                     | 1451.71                     | 484.91                       | 3                          |
| 81 | Hemoglobin subunit alpha-A                              | NHIDDIAGT          | 954.44                    | 478.23                     | 954.44                      | 478.23                       | 2                          |
| 82 | Hemoglobin subunit alpha-D                              | LSPGSDQVRGH        | 1151.57                   | 384.86                     | 1151.57                     | 384.86                       | 3                          |
| 83 | REVERSED DUF4550 domain-containing protein              | KCYTPVCLK          | 1053.55                   | 352.19                     | 1053.53                     | 352.18                       | 3                          |
| 84 | Uncharacterized protein                                 | FITSAFLT           | 898.48                    | 450.25                     | 898.48                      | 450.23                       | 2                          |
| 85 | Citrate synthase                                        | VVPGYGHAVLR        | 1166.66                   | 389.89                     | 1166.65                     | 389.89                       | 3                          |
| 86 | Transcriptional adapter                                 | QARALIKIDVNK       | 1367.81                   | 684.91                     | 1367.82                     | 684.92                       | 2                          |
| 87 | Collagen-alpha-3 type IX                                | VGLPGPIGAP         | 876.44                    | 439.23                     | 876.51                      | 439.26                       | 2                          |
| 88 | REVERSED Uncharacterized protein                        | TEKVMEDSPLRYLAL    | 1763.89                   | 588.97                     | 1763.91                     | 588.98                       | 3                          |
| 89 | REVERSED VWFA domain-containing protein                 | GTEGPLGPLGPQ       | 1121.55                   | 561.78                     | 1121.57                     | 561.79                       | 2                          |
| 90 | REVERSED Helicase ATP-binding domain-containing protein | AAELDQVEKVLRLQ     | 1497.80                   | 500.27                     | 1497.81                     | 500.28                       | 3                          |
| 91 | REVERSED Ovocleidin-116                                 | VTSPASAVEPQT       | 1185.58                   | 593.80                     | 1185.59                     | 593.80                       | 2                          |

a: Molecular weight observed in the Q-TOF mass spectrometer.

b: Mass/charge ratio observed in the Q-TOF mass spectrometer.

c: Theoretical molecular weight calculated from the identified peptide sequence.

d: Theoretical mass/charge ratio calculated from the identified peptide sequence.

e: Theoretical charge of identified peptide sequence in the Q-TOF mass spectrometer.
